# Supplementary material
Source: Royal Society of Chemistry journal article supplement (doi:10.1039/d6gc00467a)
Supplement: d6gc00467a1.pdf [file d6gc00467a1.pdf]

## **Supplementary Information**

### ***De novo* Microbial Production of Picolinic Acid via a Short-Cut Biosynthetic Pathway**

Cui Guo<sup>a</sup>, Ashley Tseng<sup>a</sup>, Nguyen N T Luu<sup>a</sup>, and Yuheng Lin<sup>a\*</sup>

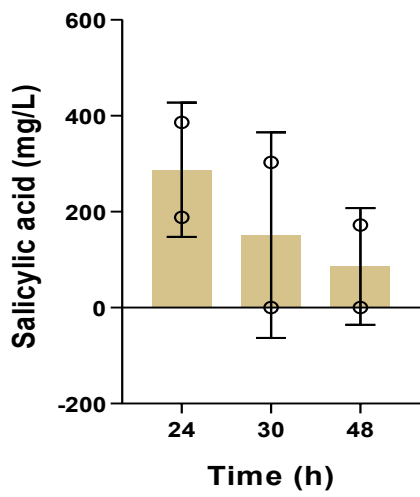

Fig. S1 Unconverted SA titer of strain PABW02.

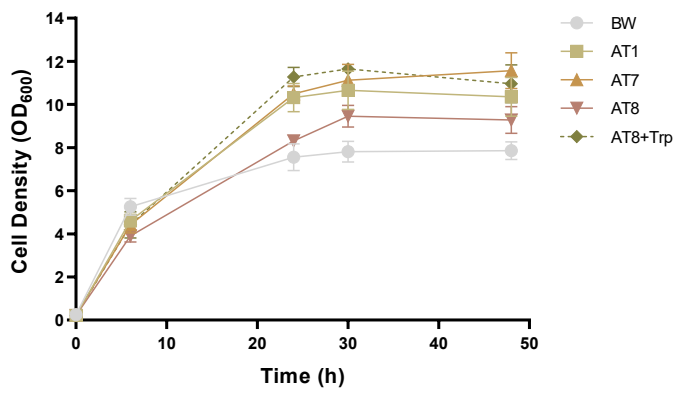

Fig. S2 OD<sub>600</sub> of glycerol strains

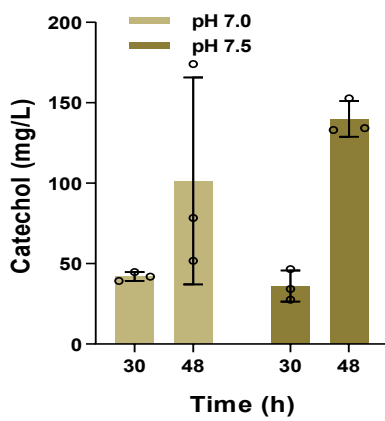

Fig. S3 Catechol accumulation in different pH medium.

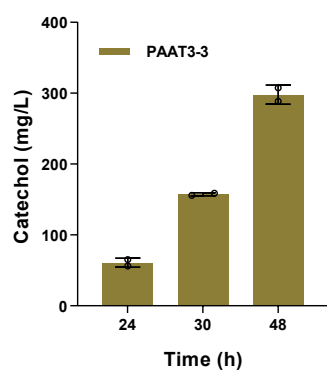

Fig. S4 Catechol accumulation of strain PAAT3-3.

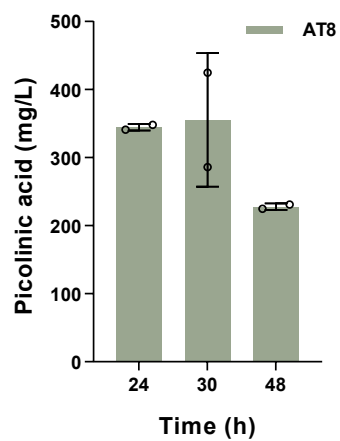

Fig. S5 Picolinic acid titer of strain PAAT8.

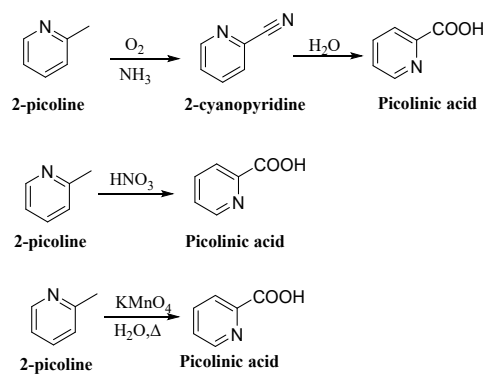

Fig. S6 Schematic of picolinic acid chemical synthesis routes.

**Table S1.** Plasmids and bacterial strains utilized in this study.

| Strains/plasmids | Relevant characteristics                                                                                                     | Sources              |
|------------------|------------------------------------------------------------------------------------------------------------------------------|----------------------|
| XL1-Blue         | <i>recA1 endA1g yrA96 thi-1 hsdR17 supE44 relA1 lac</i><br>[F' <i>proAB lacI<sup>q</sup>ZΔM15 Tn10 (Ter<sup>r</sup>)</i> ]   | Stratagene           |
| BW25113 (F')     | <i>rrnBT14 ΔlacZΔWJ16 hsdR514 ΔaraBADAH33 ΔrhaBADLD78</i> [F'<br><i>proAB lacI<sup>q</sup>ZΔM15 Tn10 (Ter<sup>r</sup>)</i> ] | <sup>1</sup>         |
| PABW01           | BW25113 (F') containing pHA-CbzE                                                                                             | This study           |
| PABW02           | BW25113 (F') containing pLC-NahG                                                                                             | This study           |
| AT1              | BW25113Δ <i>pykAF</i>                                                                                                        | This study           |
| AT2              | BW25113Δ <i>pykAFΔptsG</i>                                                                                                   | This study           |
| AT3              | BW25113Δ <i>pykAFΔptsGΔtrpE</i>                                                                                              | This study           |
| AT4              | BW25113Δ <i>pykAFΔptsGΔtrpEΔedd</i>                                                                                          | This study           |
| AT5              | BW25113Δ <i>pykAFΔptsGΔmanXYZ</i>                                                                                            | This study           |
| AT6              | BW25113Δ <i>pykAFΔptsGΔmanXYZΔtrpE</i>                                                                                       | This study           |
| AT7              | BW25113Δ <i>pykAFΔgldA</i>                                                                                                   | This study           |
| AT8              | BW25113Δ <i>pykAFΔgldAΔtrpE</i>                                                                                              | This study           |
| PAAT3-1          | AT3 containing pHA-EP, pMK-LPTG, and pLC-NahG-CbzE                                                                           | This study           |
| PAAT3-2          | AT3 containing pHA-EP, pMK-LPTG-CbzE, and pLC-NahG                                                                           | This study           |
| PAAT3-3          | AT3containing pHA-EP-CbzE, pMK-LPTG, and pLC-NahG                                                                            | This study           |
| PAAT8            | AT8 containing pHA-EP, pMK-LPTG, and pLC-NahG-CbzE                                                                           | This study           |
| Plasmids         | Description                                                                                                                  |                      |
| pCas             | <i>lacI, araBAD, pCS101 ori, Kan<sup>r</sup>, Exo, Beta, Gam, Cas9</i>                                                       | Addgene <sup>2</sup> |
| pTargetF         | J23119, <i>pMB1 ori, Sm<sup>r</sup>, sgrNA</i>                                                                               | Addgene <sup>2</sup> |
| pHA-GFP          | P <sub>L</sub> lacO1, GFP gene, T1 terminator, <i>colE1 ori</i> , and Amp <sup>r</sup>                                       | <sup>3</sup>         |
| pMK-GFP          | P <sub>L</sub> lacO1, GFP gene, T1 terminator, <i>p15A ori</i> , and Kan <sup>r</sup>                                        | <sup>1</sup>         |
| pLC-GFP          | P <sub>L</sub> lacO1, GFP gene, T1 terminator, <i>psc101 ori</i> , and Cm <sup>r</sup>                                       | <sup>1</sup>         |
| pLC-NahG         | pLC containing <i>nahG</i> from <i>Pseudomonas putida</i>                                                                    | This study           |
| pHA-CbzE         | pHA containing <i>cbzE</i> from <i>Pseudomonas putida</i>                                                                    | This study           |
| pHA-EP           | pHA containing <i>entC</i> from <i>E. coli</i> and <i>pchB</i> from <i>P. fluorescens</i> Migula                             | This study           |
| pMK-LPTG         | pMK containing <i>aroL, ppsA, tktA, aroG<sup>br</sup></i> from <i>E. coli</i>                                                | <sup>1</sup>         |
| pHA-EP-CbzE      | pHA containing <i>entC, pchB</i> and <i>cbzE</i>                                                                             | This study           |
| pMK-LPTG-CbzE    | pMK containing P <sub>L</sub> lacO1-LPTG and P <sub>L</sub> lacO1-CbzE                                                       | This study           |
| pLC-NahG-CbzE    | pLC containing <i>nahG</i> and <i>cbzE</i>                                                                                   | This study           |
| pTargetF-PykA    | pTargetF containing an N20 sequence targeting <i>pykA</i> from <i>E. coli</i>                                                | This study           |
| pTargetF-PykF    | pTargetF containing an N20 sequence targeting <i>pykF</i> from <i>E. coli</i>                                                | This study           |
| pTargetF-GldA    | pTargetF containing an N20 sequence targeting <i>gldA</i> from <i>E. coli</i>                                                | This study           |
| pTargetF-TrpE    | pTargetF containing an N20 sequence targeting <i>trpE</i> from <i>E. coli</i>                                                | This study           |
| pTargetF-PtsG    | pTargetF containing an N20 sequence targeting <i>ptsG</i> from <i>E. coli</i>                                                | This study           |
| pTargetF-ManXYZ  | pTargetF containing an N20 sequence targeting <i>manXYZ</i> from <i>E. coli</i>                                              | This study           |
| pTargetF-Edd     | pTargetF containing an N20 sequence targeting <i>edd</i> from <i>E. coli</i>                                                 | This study           |

**Table S2.** List of primers used in this study.

| Primers                      | Sequence (5'–3')                                                            | Description                                                                                                                                      |
|------------------------------|-----------------------------------------------------------------------------|--------------------------------------------------------------------------------------------------------------------------------------------------|
| cbzE-F(BamHI)                | gggaaaGGATCCAGGAGATATACCATGAACAAA<br>GGTATAATGCGCCCCG                       | For amplification of <i>cbzE</i><br>in construction of plasmid<br>pHA-EP-CbzE                                                                    |
| cbzE-R(ApaI)                 | gggaaaGGGCCCTCAGGTCAGCACGGTCATGAAT<br>CGTTC                                 |                                                                                                                                                  |
| pHA/MK-F (AvrII)             | gggaaaCCTAGGaattgtgagcggataacaattgacattgtgagc                               | For amplification of <i>cbzE</i><br>in construction of plasmid<br>pMK-LPTG-CbzE                                                                  |
| pHA/MK-R (SacI)              | gggaaaGAGCTCGCGGCGGATTTGTCCTACTCAG<br>GAG                                   |                                                                                                                                                  |
| cbzE-F(SalI)                 | gggaaaGTCGACAGGAGATATACCATGAACAAA<br>GGTATAATGCGCCCC                        | For amplification of <i>cbzE</i><br>in construction of plasmid<br>pLC-NahG-CbzE                                                                  |
| cbzE-F(BamHI)                | gggaaaGGATCCTCAGGTCAGCACGGTCATGAAT<br>C                                     |                                                                                                                                                  |
| pykA-Upstream-F              | ATGTCCAGAAGGCTTCGCAG                                                        | For construction of <i>pykA</i><br>homologous arms                                                                                               |
| pykA-Upstream-R              | CTTAATGTCTGCTTTGTCTTTTTCGGTCAG                                              |                                                                                                                                                  |
| pykA-Downstream-F            | CTGACCGAAAAAGACAAAGCAGACATTAAGG<br>TATCAGCTCTGGTCTGCCAATTTTC                |                                                                                                                                                  |
| pykA-Downstream-R            | TTACTCTACCGTTAAAATACGCGTGG                                                  |                                                                                                                                                  |
| pykF-Upstream-F              | ATGAAAAAGACCAAAATTGTTTGCACC                                                 | For construction of <i>pykF</i><br>homologous arms                                                                                               |
| pykF-Upstream-R              | GTTACCTTCAATGGCGGTAACCTCG                                                   |                                                                                                                                                  |
| pykF-Downstream-F            | GGTATGGAAGTTACCGCCATTGAAGGTAACAG<br>TACGTAAATACTTCCCGGATGC                  |                                                                                                                                                  |
| pykF-Downstream-R            | TTACAGGACGTGAACAGATGCG                                                      |                                                                                                                                                  |
| pykA-N20-sgRNA-F<br>(SpeI)   | gggaaaactagtAGCGTCAGTACCATCCAGAAgttttaga<br>gctagaaatagcaagttaaaataaggctag  | For amplification of <i>pykA</i><br>and <i>pykF</i> N20 fragments<br>in construction of<br>plasmids pTargetF-PyKA<br>and pTargetF-PyKF           |
| pykF-N20-sgRNA-F<br>(SpeI)   | gggaaaactagtTCACTGCGTCAGTACCGTTCGgttttagag<br>ctagaaatagcaagttaaaataaggctag |                                                                                                                                                  |
| sgRNA-R (XhoI)               | gggaaaactcagtagggataacagggtaatagatc                                         |                                                                                                                                                  |
| ptsG-Upstream-F              | ATGTTTAAGAATGCATTTGCTAACCTGC                                                | For construction of <i>ptsG</i><br>homologous arm;<br>amplification of <i>ptsG</i> N20<br>fragment in construction<br>of pTargetF-PtsG           |
| ptsG-Upstream-R              | CAAAGAAGCCAAGATACTCAGGCAG                                                   |                                                                                                                                                  |
| ptsG-Downstream-F            | AAGCTGCCTGAGTATCTTGCTTCTTTGCTGTA<br>TTCTTCTGGGGATGCGTG                      |                                                                                                                                                  |
| ptsG-Downstream-R            | TTAGTGGTTACGGATGTACTCATCC                                                   |                                                                                                                                                  |
| ptsG-N20-sgRNA-F<br>(SpeI)   | gggaaaactagtGGGTCACCCGCCATATAACGgttttaga<br>gctagaaatagcaagttaaaataaggctag  |                                                                                                                                                  |
| gldA-Upstream-F              | ATGGACCGCATTATTCAATCACCG                                                    | For construction of <i>gldA</i><br>homologous arm;<br>amplification of <i>gldA</i> N20<br>fragment in construction<br>of pTargetF-GldA           |
| gldA-Upstream-R              | GTGTGACAATGACCATATTCGG                                                      |                                                                                                                                                  |
| gldA-Downstream-F            | AAATAACCCGAATATGGTCATTGTCGACACCG<br>TGATTGAAGCGAACACCTATTTG                 |                                                                                                                                                  |
| gldA-Downstream-R            | TTATTTCCACTCTTGCAGGAAACG                                                    |                                                                                                                                                  |
| gldA-N20-sgRNA-F<br>(SpeI)   | gggaaaactagtGCACTTGCCGCCGCCATGGgttttaga<br>gctagaaatagcaagttaaaataaggctag   |                                                                                                                                                  |
| trpE-Upstream-F              | ATGCAAACACAAAAACCGACTCTC                                                    | For construction of <i>trpE</i><br>homologous arm;<br>amplification of <i>trpE</i> N20<br>fragment in construction<br>of pTargetF-TrpE           |
| trpE-Upstream-R              | GCGTTTCAGCGAGATAAAAACAGAAATC                                                |                                                                                                                                                  |
| trpE-Downstream-F            | TAAGTGCCTGATTTCTGTTTTATCTCGCGTA<br>CCGATCATAAAGAGCTGTCTGAAC                 |                                                                                                                                                  |
| trpE-Downstream-R            | TCAGAAAGTCTCCTGTGCATGATG                                                    |                                                                                                                                                  |
| trpE-N20-sgRNA-F<br>(SpeI)   | gggaaaactagtAGCACGTAATAGGCCGCCAGgttttaga<br>gctagaaatagcaagttaaaataaggctag  |                                                                                                                                                  |
| manXYZ-Upstream-F            | GTCCATTAAGAATTCCATGACAAGCTC                                                 | For construction of<br><i>manXYZ</i> homologous arm;<br>amplification of <i>manXYZ</i><br>N20 fragment in<br>construction of pTargetF-<br>ManXYZ |
| manXYZ-Upstream-R            | CTATAACAATAGCAATGGTCACTTGCTACC                                              |                                                                                                                                                  |
| manXYZ-Downstream-F          | GTAGCAAGTGACCATTGCTATTGTTATAGGTA<br>TCGATATCGTTAAAGATATGGGTGGTG             |                                                                                                                                                  |
| manXYZ-Downstream-R          | CAATCAATCCGACGAAGATAACGCTATC                                                |                                                                                                                                                  |
| manXYZ-N20-sgRNA-F<br>(SpeI) | gggaaaactagtAGAAATGATAGAAGCCAGAGgttttag<br>agctagaaatagcaagttaaaataaggctag  |                                                                                                                                                  |
| edd-Upstream-F-1             | ATGAATCCACAATTGTTACGCGTAACAAATC                                             | For construction of <i>edd</i><br>homologous arm;<br>amplification of <i>edd</i> N20<br>fragment in construction                                 |
| edd-Upstream-R-1             | GTTACCACCACTTTCTCATCGATCATC                                                 |                                                                                                                                                  |
| edd-Downstream-F-1           | GATGATCGATGAGAAAGTGGTGGTGAACGAA                                             |                                                                                                                                                  |

|                              |                                                                              |                 |
|------------------------------|------------------------------------------------------------------------------|-----------------|
|                              | CAACCTTTCTCTCATCATGGTGGG                                                     | of pTargetF-EDD |
| edd-Downstream-R-1           | TTAAAAAGTGATACAGGTTGCGCCCTG                                                  |                 |
| edd-N20-sgRNA-F V3<br>(SpeI) | gggaaaACTAGTGCATGAAGATGTCAATACGGGT<br>TTAGAGCTAGAAATAGCAAGTAAAATAAGG<br>CTAG |                 |

## Reference

1. C. Guo, N. N. T. Luu, M. M. Adwer, H. Hosseinzadeh, V. Balan, Y. Yan and Y. Lin, *Metabolic Engineering*, 2026, **94**, 24-34.
2. Y. Jiang, B. Chen, C. Duan, B. Sun, J. Yang and S. Yang, *Applied and environmental microbiology*, 2015, **81**, 2506-2514.
3. V. Nguyen, A. Tseng, C. Guo, M. Adwer and Y. Lin, *Enzyme and Microbial Technology*, 2025, **185**, 110590.
